# Supplementary material for: Improving energy storage properties of PbHfO3-based antiferroelectric ceramics with lower phase transition fields
Source: Royal Society of Chemistry journal article supplement (doi:10.1039/d3qi01924a), 2023-11-07
Supplement: d3qi01924a1.pdf [file d3qi01924a1.pdf]

# **Improving Energy Storage Properties of PbHfO<sub>3</sub>-Based Antiferroelectric Ceramics with Lower Phase Transition Fields**

**Yan Li,<sup>a</sup> Tongqing Yang<sup>a\*</sup> and Xiaohui Liu<sup>a</sup>**

<sup>a</sup>Key Laboratory of Advanced Civil Engineering Materials of the Ministry of Education, Functional Materials Research Laboratory, School of Materials Science and Engineering, Tongji University, 4800 Cao'an Road, Shanghai, 201804, China

E-Mail: [Yangtongqing@tongji.edu.cn](mailto:Yangtongqing@tongji.edu.cn)

## Experimental section

The high-quality slurry was synthesized by mixing the second ball-milled PLHST matrix powders with solvent (toluene/ethanol), dispersant (phosphate ester), binder (polyvinyl butyral), plasticizer (polyethylene glycol-400/benzyl butyl phthalate) and homogenizer(cyclohexanone). After ball milling for 24h, the bubbles were removed from the slurry in a vacuum defoaming machine. The homogeneous slurry with good liquidity was cast on PET release film by using a tape casting machine. The wet films were kept for 12 h at room temperature for desiccation. The ceramic thick films were cut to square with a side length of 12 mm x 12 mm and the same thick films were pressed into square green bodies at 30 MPa and 70 °C by using a hot press mold. Finally, the samples were sintered to form ceramics. The thickness of testing sample is about 100  $\mu\text{m}$ .

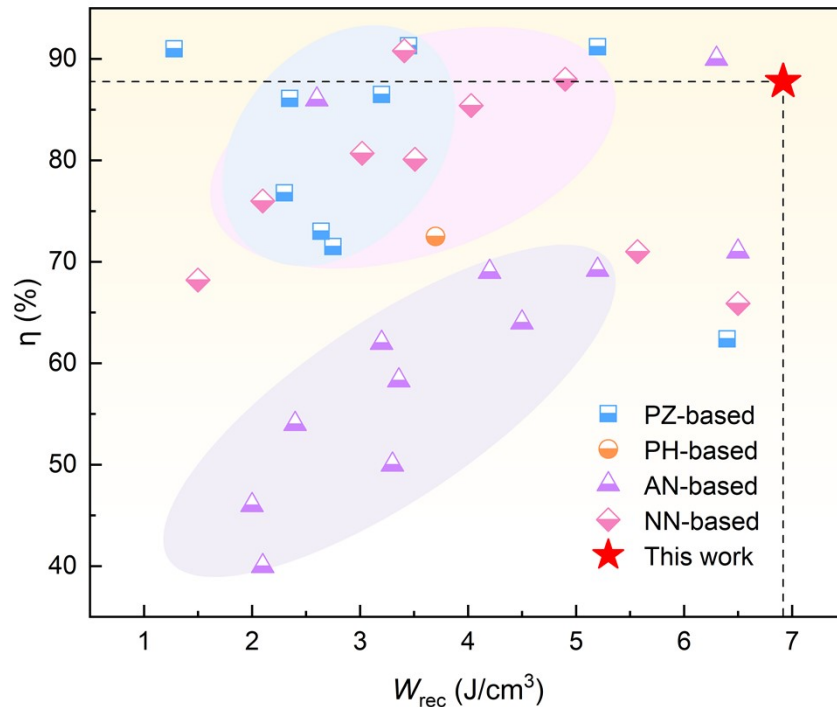

**Fig. S1** A comparison of  $W_{\text{rec}}$  and  $\eta$  among this work and previously reported ceramics. PZ:  $\text{PbZrO}_3$ , PH:  $\text{PbHfO}_3$ , AN:  $\text{AgNbO}_3$ , NN:  $\text{NaNbO}_3$ .
